# Supplementary material
Source: PubMed Central journal article supplement (PMC7508595)

**Table S1.**

| Description                        | Estimate | RSE   |
|------------------------------------|----------|-------|
| Structural model                   |          |       |
| V1 (L)                             | 28.4     | 10.7% |
| V1 dialysis (L)                    | 37.9     | 12.8% |
| V2 (L)                             | 28.4     | 11.4% |
| CL renal (L/h)                     | 0.004    | 31.1% |
| CL non-renal (L/h)                 | 0.342    | 29.2% |
| CL dialysis (L/h)                  | 1.33     | 28.3% |
| Inter-compartmental CL (L/h)       | 18.9     | 28.3% |
| Inter-individual variability (%CV) |          |       |
| V1                                 | 0.09     | 45.7% |
| CL renal                           | 0.0257   | 94.6% |
| CL dialysis                        | 0.208    | 72.1% |
| Residual error                     |          |       |
| Proportional error                 | 0.0049   | 10.9% |

**Table S1.** Parameter estimates

Table legend: V1 = volume of distribution of the central compartment; V1 dialysis = volume of distribution of the central compartment during dialysis. V2 = volume of distribution of the peripheral compartment; CL renal = renal clearance; CL non-renal = clearance through other non-renal mechanisms ; CL dialysis = extracorporeal clearance by the dialysis machine.

RSE = root mean square error; %CV = percentage of coefficient of variation.

All volume and flow parameters are scaled to a typical man of 1.80m and 70 kg, corresponding to a fat-free mass of 57.18 kg.

**Figure S1.** Goodness-of-fit plots for the final pharmacokinetic model of fluconazole.

In the final model the central volume of distribution was dependent on lean body weight (linear function) as well as on renal function. Clearance was dependent on fat free mass (allometric), renal function and CRRT. Interindividual variability (IIV) was allowed on clearance and volume of distribution of compartment of the central compartment ( $V_c$ ). Inter-occasion variability (IOV) on clearance further improved the model. As GFR alone did not sufficiently predict total clearance of fluconazole, an estimated (non-renal) clearance of was added to the model.

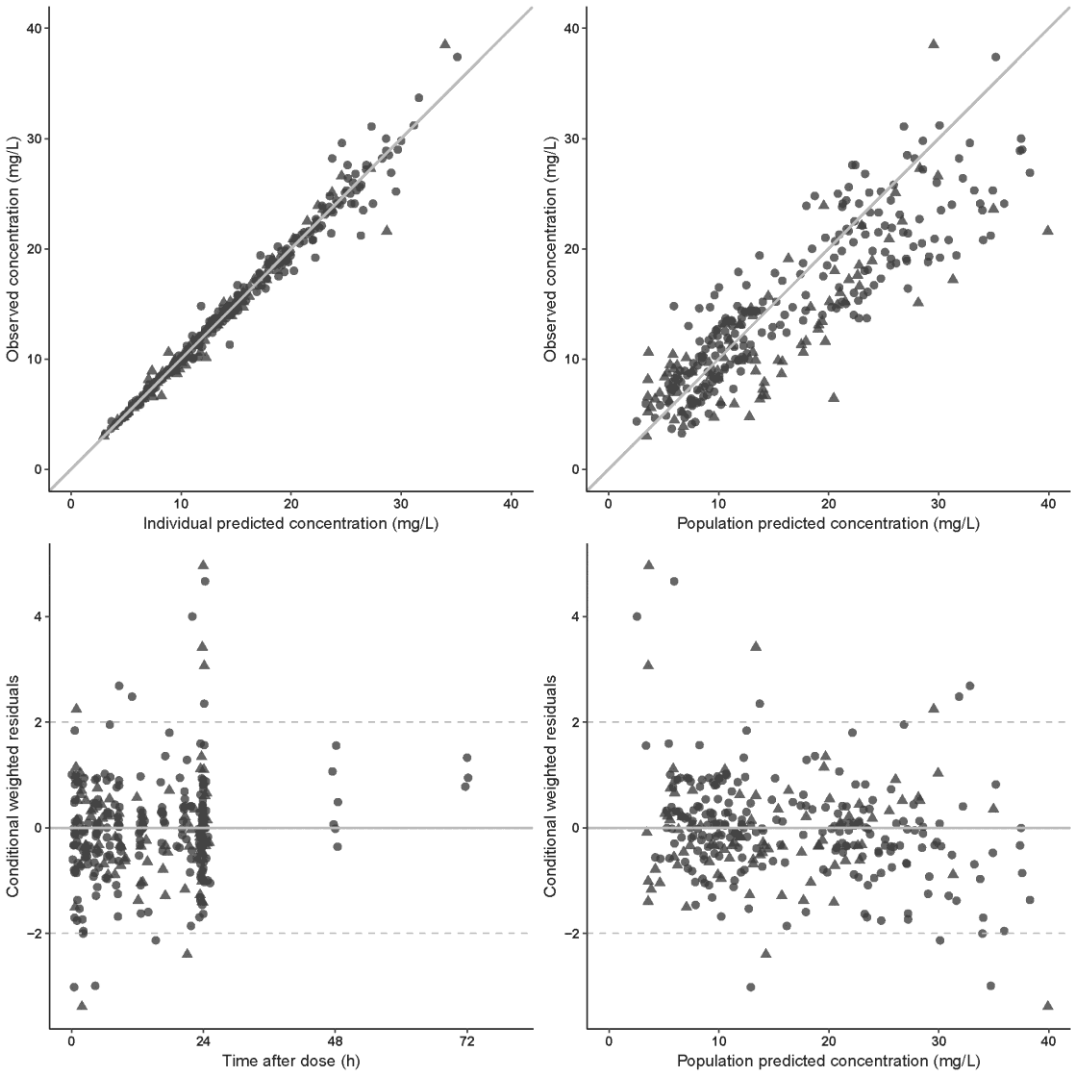

Supplement: AAC.00984-20-s0001.pdf [file AAC.00984-20-s0001.pdf]
